# Supplementary material
Source: ML conference proceedings conference paper supplement (https://openaccess.thecvf.com/content/ICCV_2019/html/Mustafa_U4D_Unsupervised_4D_ICCV_2019_paper.html)
Supplement: Supplementary file 1 [file Mustafa_U4D_Unsupervised_4D_ICCV_2019_supplemental.zip]

Archive with 2 entries (2 files):
- supplementary/1924-supp.pdf
- supplementary/U4D.mp4
